# Supplementary material for: Efficiently improving the adsorption capacity of the Rhodamine B dye in a SO3H-functionalized chromium-based metal–organic framework
Source: Royal Society of Chemistry journal article supplement (doi:10.1039/d3ma00123g), 2023-01-01
Supplement: d3ma00123g1.pdf [file d3ma00123g1.pdf]

## Supporting information

### **Efficiently improving the adsorption capacity of Rhodamine B dye in a SO<sub>3</sub>H-functionalized chromium-based metal-organic framework**

Khang M. V. Nguyen,<sup>a</sup> Anh V. N. Phan,<sup>a</sup> Nhung T. Dang,<sup>a</sup> Truong Q. Tran,<sup>a</sup> Huy K. Duong,<sup>a</sup> Hung N. Nguyen and My V. Nguyen<sup>\*a</sup>

<sup>a</sup> Faculty of Chemistry, Ho Chi Minh City University of Education, Ho Chi Minh City, 700000, Vietnam.

\*To whom correspondence should be addressed: [mynv@hcmue.edu.vn](mailto:mynv@hcmue.edu.vn)

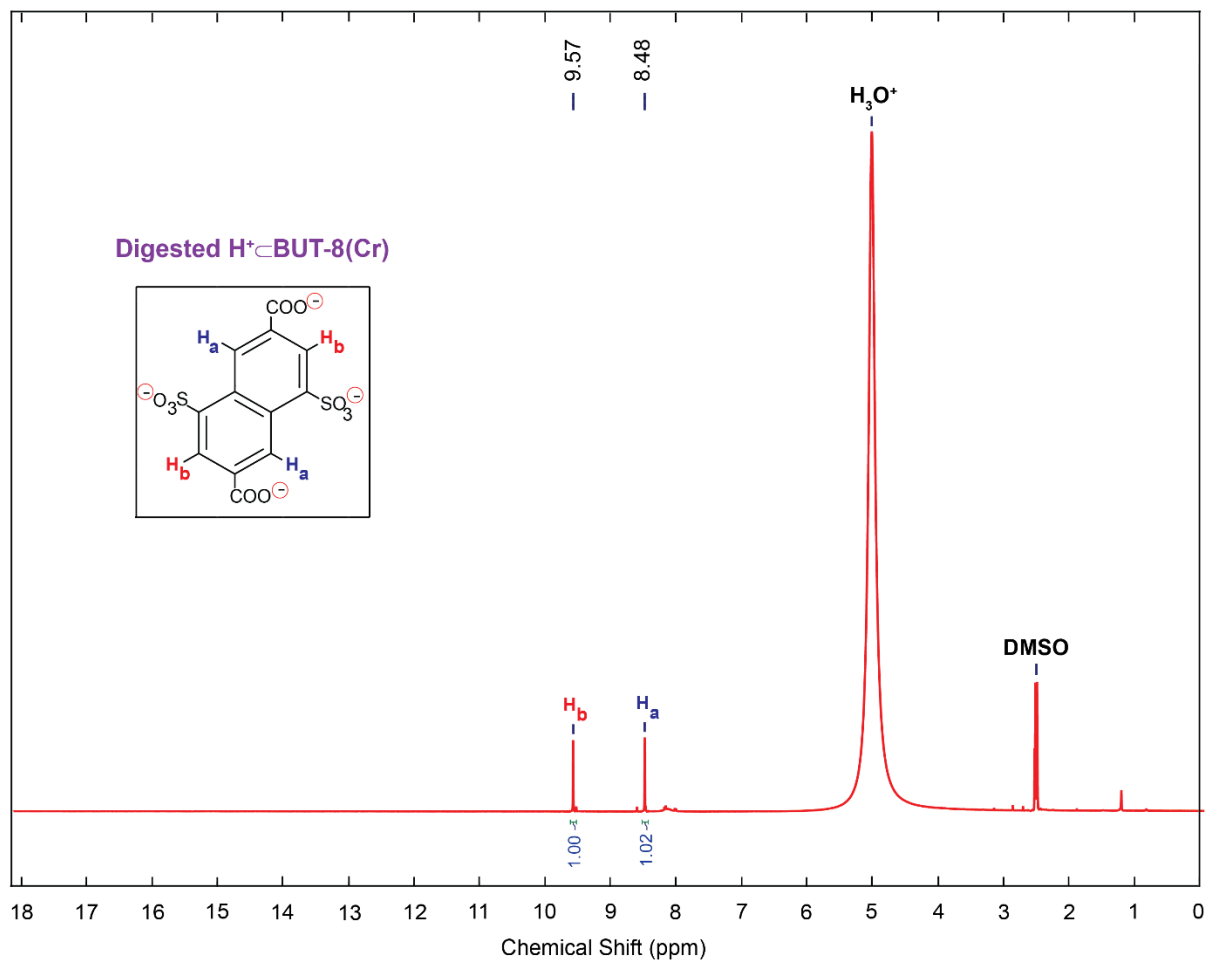

**Figure S1.** <sup>1</sup>H-NMR spectrum of digested H<sup>+</sup>-BUT-8(Cr) in DMSO solvent

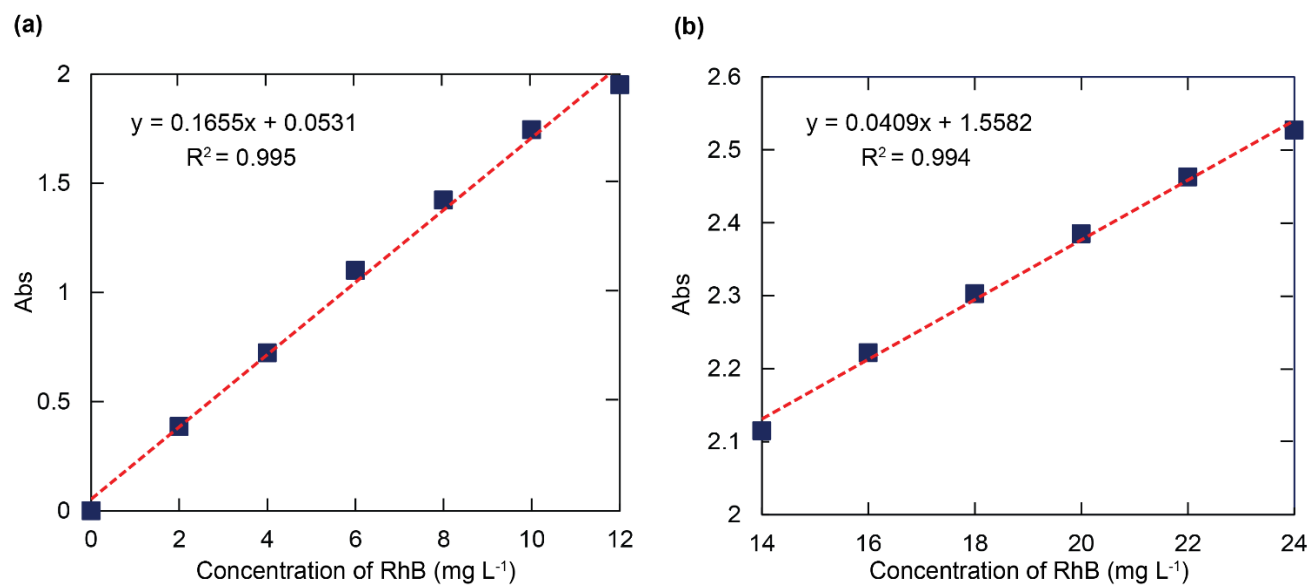

**Figure S2.** The relationship between the absorbed intensity of RhB and different concentrations of 0 - 24  $\text{mg L}^{-1}$  by linear fitting.

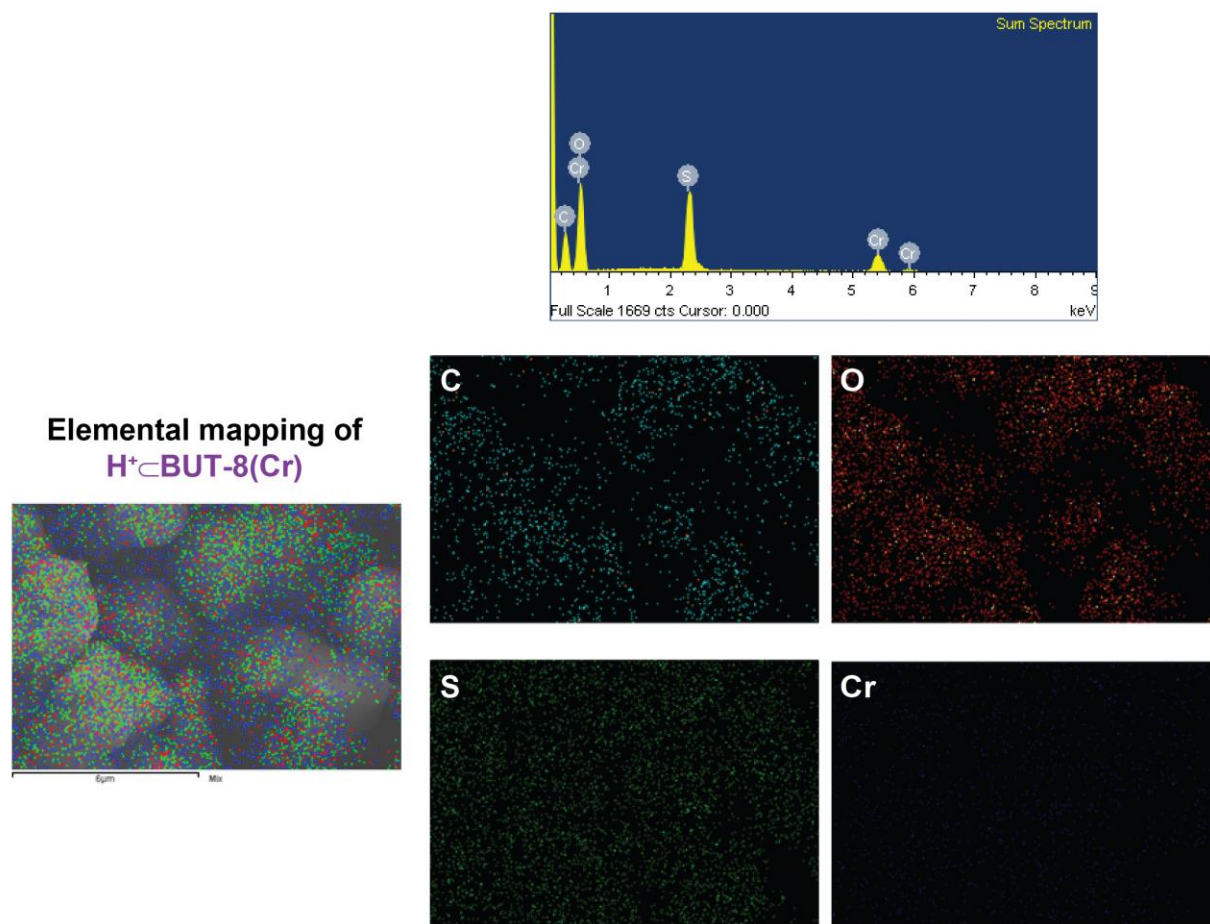

**Figure S3.** Elemental mapping by SEM-EDX of  $\text{H}^+\text{C}\text{BUT-8}(\text{Cr})$

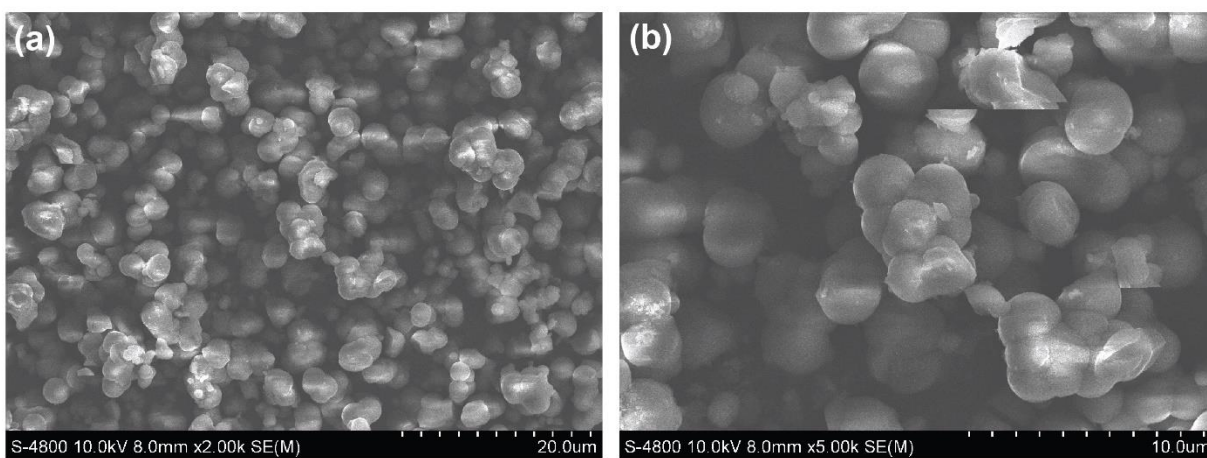

**Figure S4.** SEM images of H<sup>+</sup>CBUT-8(Cr) at different scale bars of 20.0 μm and 10.0 μm, respectively

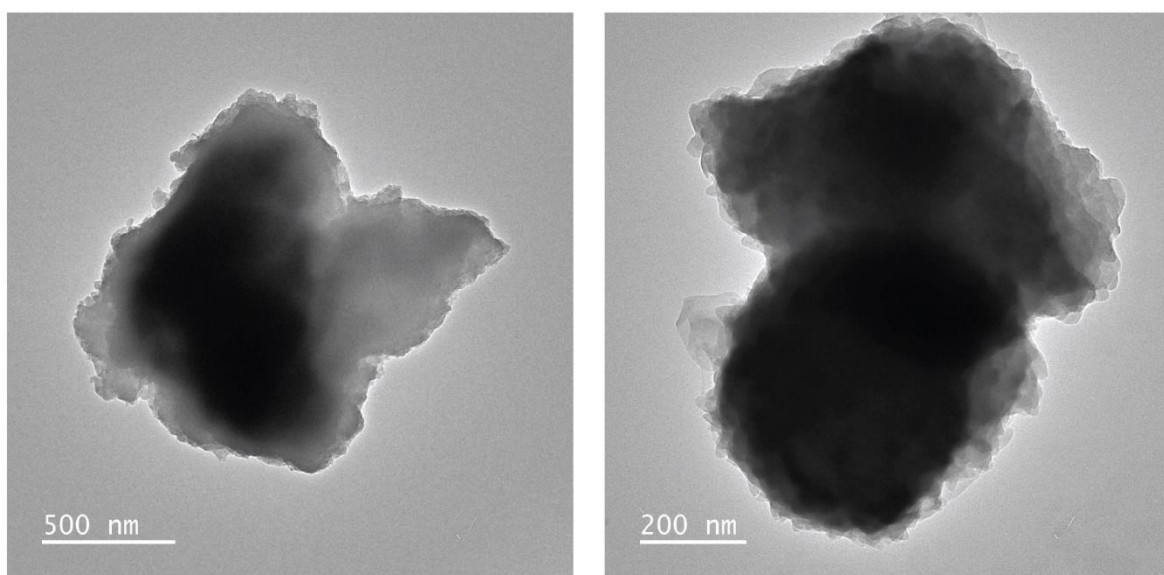

**Figure S5.** TEM images of H<sup>+</sup>CBUT-8(Cr) at at different scale bars of 500 nm and 200 nm, respectively

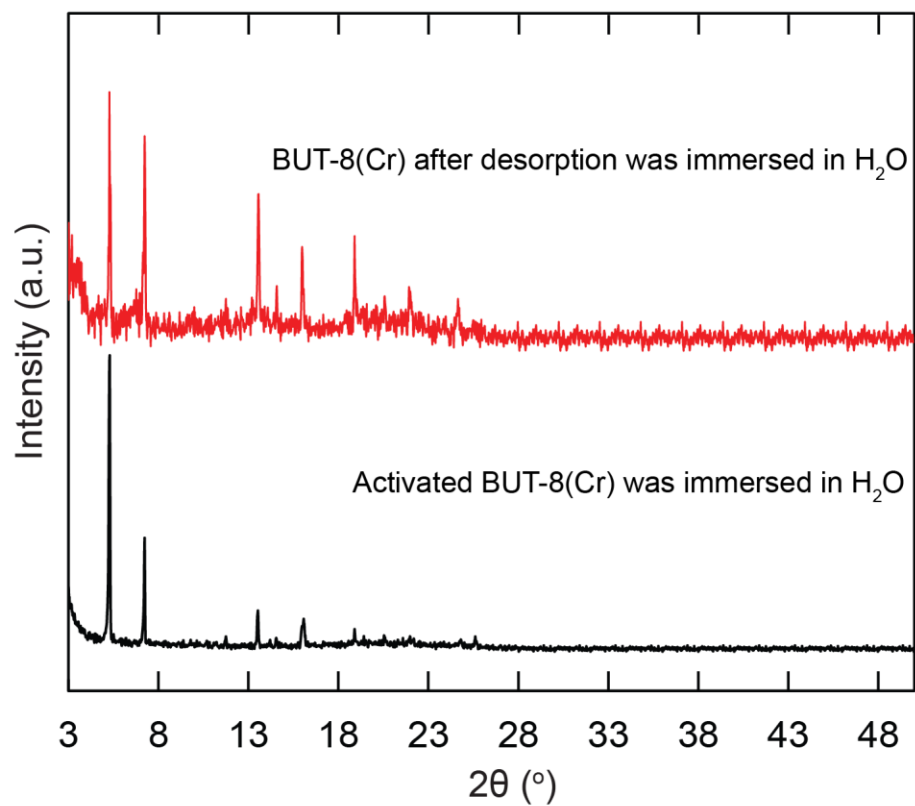

**Figure S6.** PXRD pattern of H<sup>+</sup>⊂BUT-8(Cr) before adsorption of RhB and immersed in water (black) as compared to the experimental pattern from the subjecting H<sup>+</sup>⊂BUT-8(Cr) after desorption of RhB.

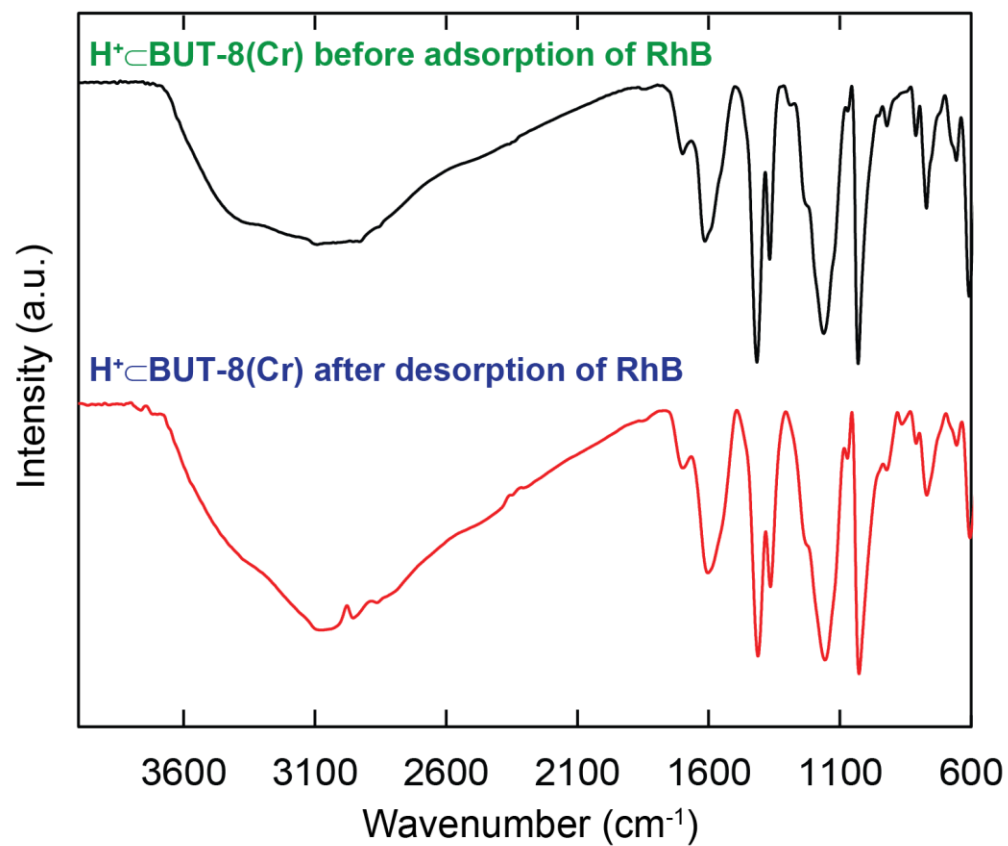

**Figure S7.** FT-IR spectrum of H<sup>+</sup>CBUT-8(Cr) before adsorption of RhB (black) in comparison with FT-IR spectrum of H<sup>+</sup>CBUT-8(Cr) after desorption of RhB (red).



## N<sub>2</sub> adsorption measurement and surface area prediction

The porosity analysis of activated H<sup>+</sup>CBUT-8(Cr) was measured by N<sub>2</sub> adsorption at 77 K.

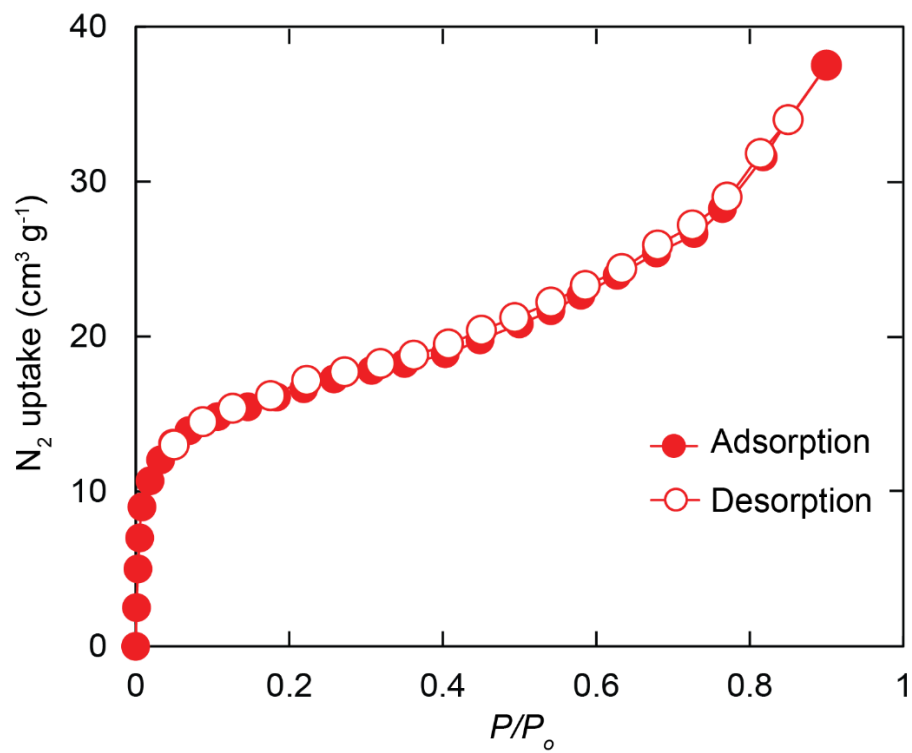

**Figure S8.** N<sub>2</sub> isotherm of H<sup>+</sup>CBUT-8(Cr) material at 77 K.

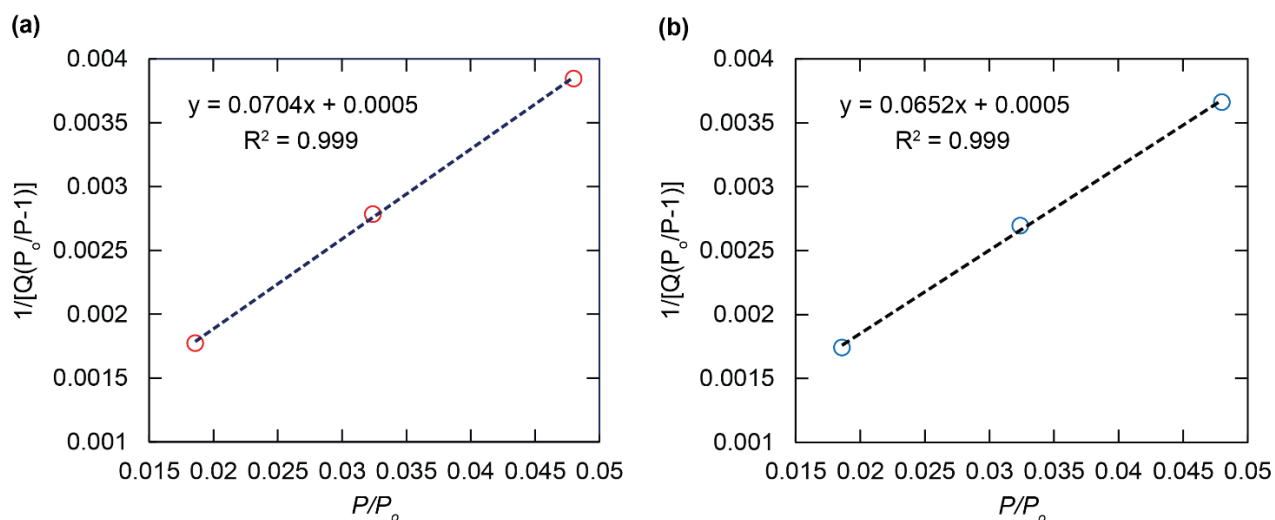

(c)

| Parameters                                            | BET model         | Langmuir model    |
|-------------------------------------------------------|-------------------|-------------------|
| P/P <sub>0</sub> range                                | 0.01858 - 0.04799 | 0.01858 - 0.04799 |
| Correlation Coefficient                               | 0.999             | 0.999             |
| C                                                     | 141.8             | 130.4             |
| Q <sub>m</sub> (cm <sup>3</sup> g <sup>-1</sup> STP)  | 14.104            | 15.337            |
| Molecular cross-sectional area (S / nm <sup>2</sup> ) | 0.1620            | 0.1620            |
| Surface area (m <sup>2</sup> g <sup>-1</sup> )        | 61.41             | 66.77             |

$$S = \frac{Q_m \times N_A \times A}{V}$$

Where  $S$  and  $Q_m$  are the BET or Langmuir surface area and quantity adsorbed.  $N_A$  is Avogadro's number,  $A$  is the molecular-sectional area and  $V$  symbolizes the molar volume of adsorbed gas.

**Figure S9.** Plot of the linear region of the adsorption N<sub>2</sub> isotherm used for the BET equation (a), the Langmuir equation (b), and summary of parameters in the BET and Langmuir analysis (c).

### Theoretical surface area prediction

The theoretical surface area of  $\text{H}^+\text{CBUT-8}(\text{Cr})$  was calculated through the Atom Volumes and Surfaces tool of *Materials Studio 7.0* software with a grid interval of 0.25 Å and the solvent diameter, which is equal to a nitrogen probe diameter of 3.68 Å. The accessible solvent surface area of  $\text{H}^+\text{CBUT-8}(\text{Cr})$  was calculated to be 3482 Å<sup>2</sup>. This data was converted into the surface area per gram, leading to a theoretical surface area of 2751 m<sup>2</sup> g<sup>-1</sup>.

**Table S1.** Summary of surface area calculation for  $\text{H}^+\text{CBUT-8}(\text{Cr})$

| $\text{H}^+\text{CBUT-8}(\text{Cr})$                  |                      |
|-------------------------------------------------------|----------------------|
| Crystal density (g cm <sup>-3</sup> )                 | 0.707 <sup>[1]</sup> |
| Accessible solvent surface per cell (Å <sup>2</sup> ) | 3482                 |
| Calculated SA (m <sup>2</sup> g <sup>-1</sup> )       | 2751                 |
| Unit cell volume (Å <sup>3</sup> )                    | 17903 <sup>[1]</sup> |

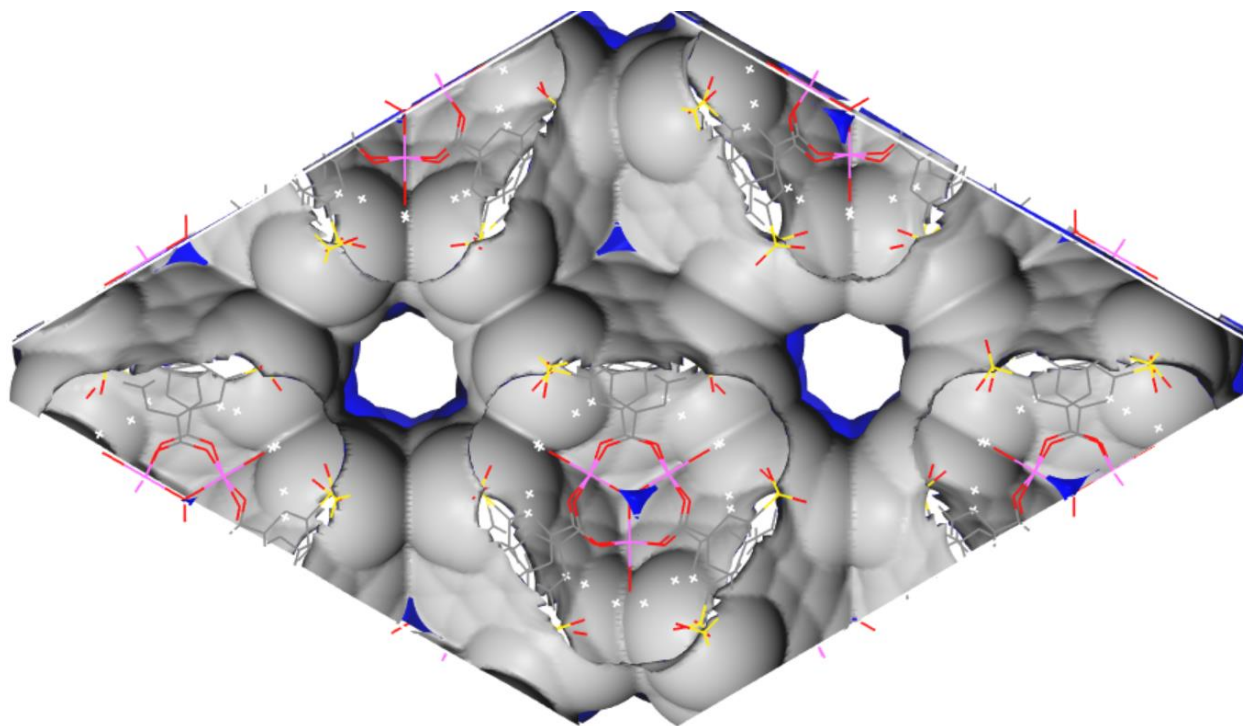

**Figure S10.** Accessible solvent surface and van der Waals surface of  $\text{H}^+\text{CBUT-8}(\text{Cr})$ .

[1] F. Yang, G. Xu, Y. Dou, B. Wang, H. Zhang, H. Wu, W. Zhou, J. Li and B. Chen, A flexible metal–organic framework with a high density of sulfonic acid sites for proton conduction, *Nature Energy*, 2017, **2**, 877–883.

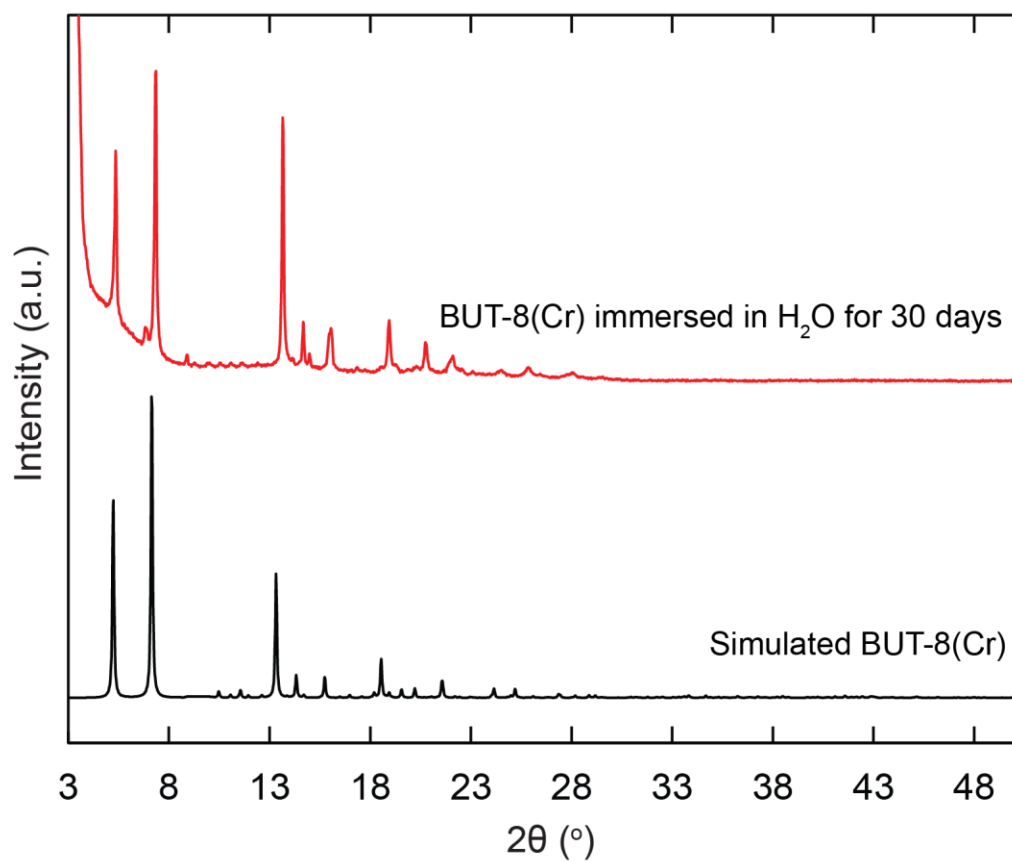

**Figure S11.** PXRD pattern of BUT-8(Cr) immersed in water for 30 days in comparison with the simulated structure

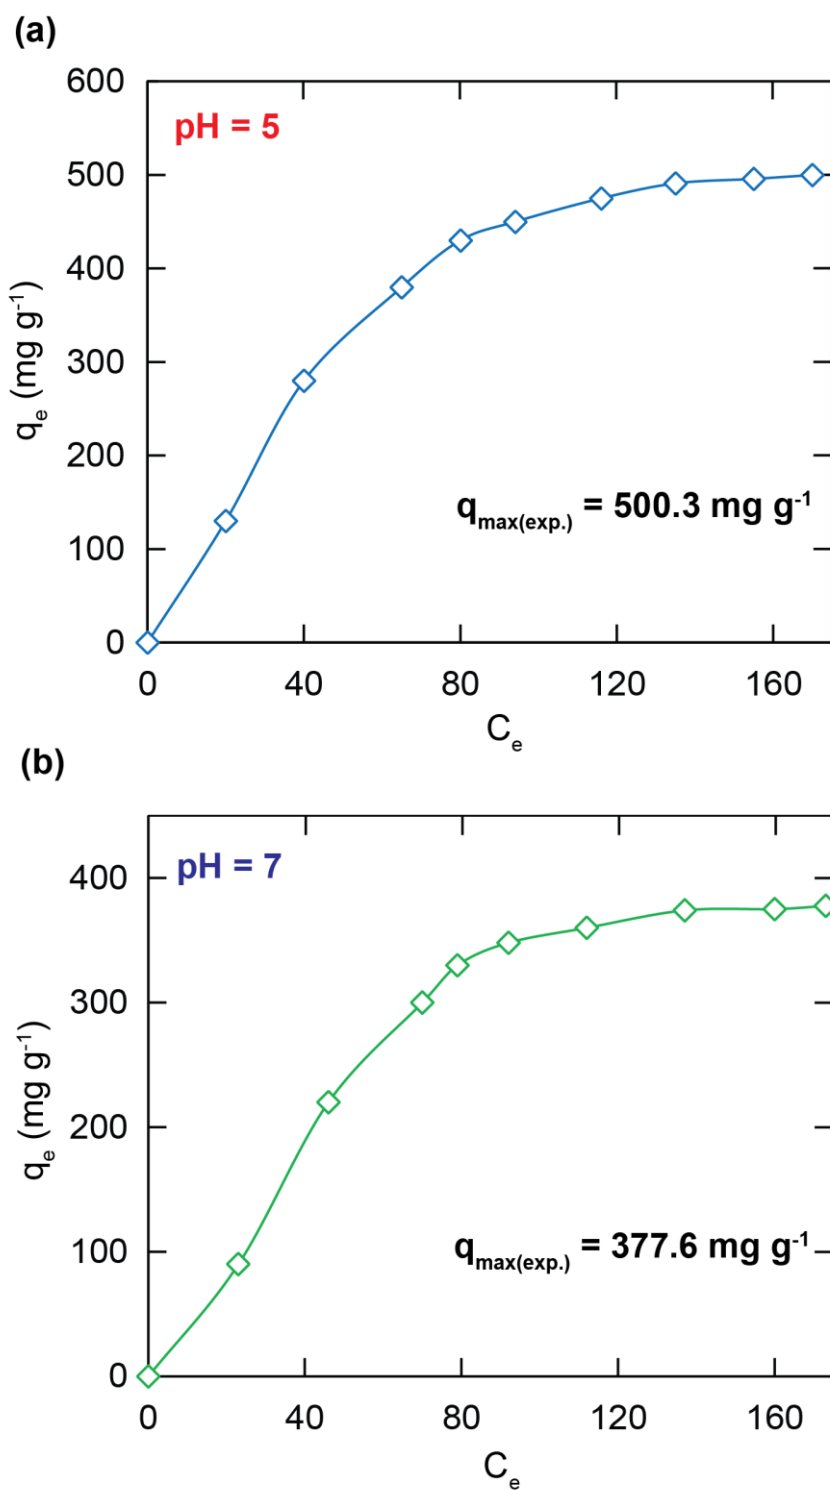

**Figure S12.** Effect of the concentration of RhB on the adsorption capacity of  $\text{H}^+\text{CBUT-8(Cr)}$  [ $m = 10 \text{ mg}$ ,  $V_{\text{RhB}} = 100 \text{ mL}$ ,  $C_0$ :  $25\text{-}175 \text{ mg L}^{-1}$ ,  $t = 24 \text{ h}$ ] at pH = 5 (a); pH = 7 (b).

### Adsorption isothermal models

The linear forms of the Langmuir, Freundlich, and Temkin are indicated by the equations (S1)-(S3):

$$\frac{C_e}{q_e} = \frac{1}{K_L q_m} + \frac{C_e}{q_m} \quad (S1)$$

$$\log q_e = \log K_F + \frac{1}{n} \log C_e \quad (S2)$$

$$q_e = \frac{RT}{b} \ln(k_T C_e) \quad (S3)$$

Where  $C_e$  ( $\text{mg L}^{-1}$ ) and  $q_e$  ( $\text{mg g}^{-1}$ ) are the RhB concentration and adsorption capacity at equilibrium, respectively,  $q_m$  ( $\text{mg g}^{-1}$ ) is the theoretical maximum capacity of the RhB adsorption.  $K_L$  ( $\text{L mg}^{-1}$ ) and  $K_F$  ( $\text{mg g}^{-1} (\text{L g}^{-1})^{1/n}$ ) display the constants of Langmuir and Freundlich, respectively.  $1/n$  value symbolizes the adsorption capacity index of Freundlich isotherm. Meanwhile,  $R$  is the gas constant,  $\beta$  and  $k_T$  are the constant of adsorption heat and the constant of Temkin, respectively, and  $T$  is the adsorption temperature.

The separation factor ( $R_L$ ) is used by equation (S4):

$$R_L = \frac{1}{1 + K_L C_o} \quad (S4)$$

Where  $C_o$  and  $K_L$  are the initial concentration of RhB and the constant of Langmuir, respectively.
